# Supplementary material
Source: PubMed Central journal article supplement (PMC4078366)

*ALK* Rearranged Cases (n=7)

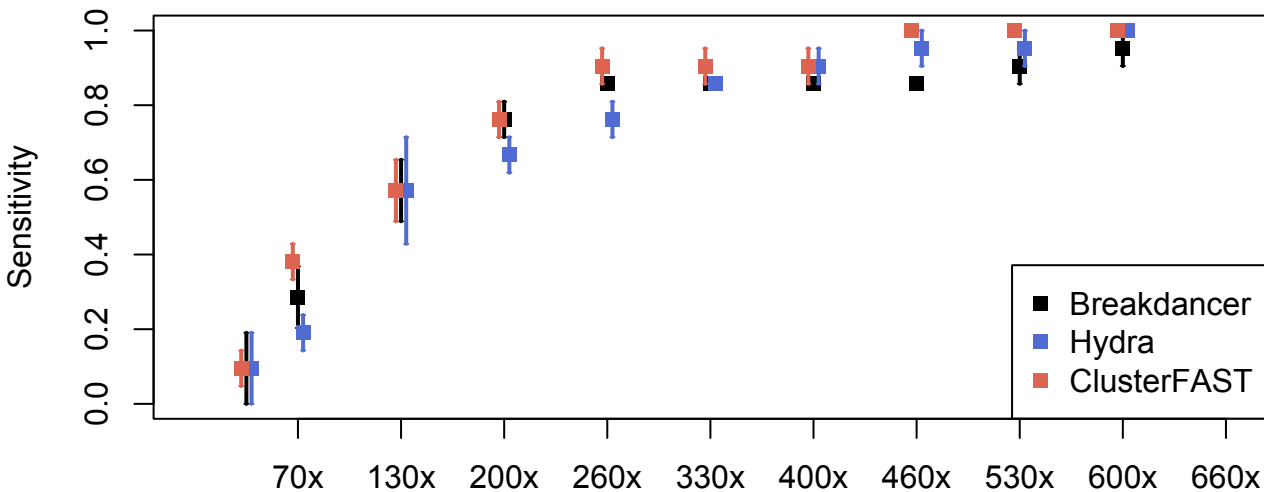

*KMT2A* Rearranged Cases (n=6)

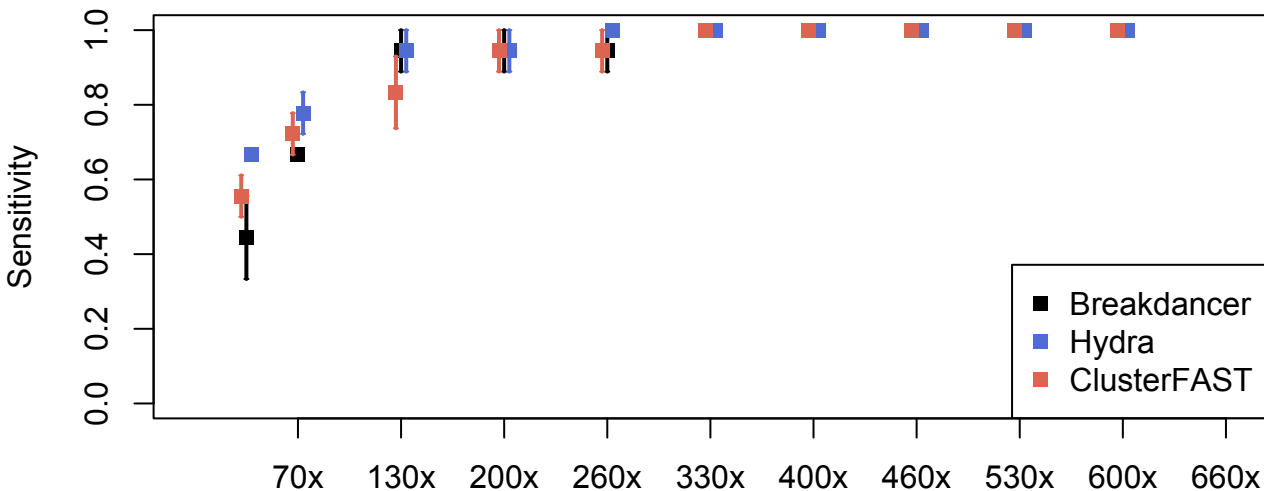

Mean coverage over targeted region

Supplement: mmc2.pdf [file mmc2.pdf]
